# Supplementary material for: Post-translational control of genetic circuits using Potyvirus proteases
Source: PubMed Central journal article supplement — Nucleic Acids Res. 2016 Jun 13;44(13):6493–502. doi: 10.1093/nar/gkw537 (PMC5291274; doi:10.1093/nar/gkw537), 2016-06-13
Supplement: supp_gkw537_nar-00763-h-2016-File003.pdf [file supp_gkw537_nar-00763-h-2016-File003.pdf]

**Supplemental information for:**

## **Post-translational control of genetic circuits using *Potyvirus* proteases**

Jesus Fernandez-Rodriguez and Christopher A. Voigt

Supplementary Figure 1. *Controlled degradation of TetR and PhIF*

Supplementary Figure 2. *Time course analysis of degron-activated circuits*

Supplementary Figure 3. *Controlled release of PhIF and TetR compared to  $P_{tac}$  induction*

Supplementary Figure 4. *Effect of the P1' position on the cleavage efficiency*

Supplementary Figure 5. *Increase of dynamic range by decoupled expression of SuMMV from main circuit*

Supplementary Figures 6-9. *Plasmid maps*

Table S1: Genetic parts used in this study

Table S2: Accession numbers for plasmids used in this study

Supplementary References

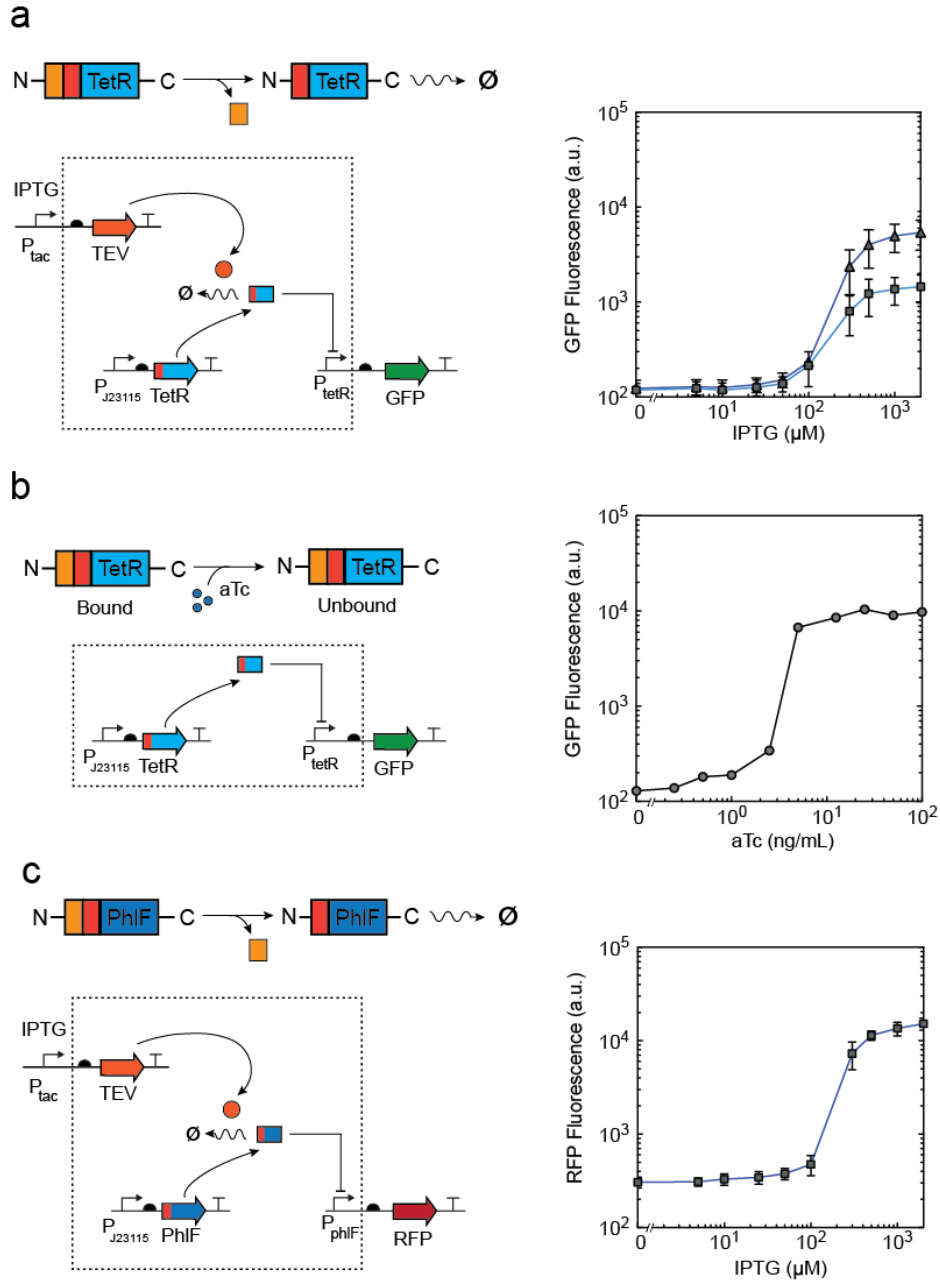

**Supplementary Figure 1: Controlled degradation of TetR and PhIF. (A)** The circuit schematic and response function for the TEV-mediated controlled degradation of TetR are shown. Cells containing ptevF-TetR (deep blue line, triangles) or ptevY-TetR (light blue line, squares) and pTac-TEV were grown at different concentrations of IPTG for 6 hours and the resulting GFP fluorescence tracked by flow cytometry. **(B)** The circuit schematic and response function for the activation by anhydrotetracycline (aTc) is shown in cells containing ptevF-TetR without protease. **(B)** The circuit schematic and response function for the TEV-mediated controlled degradation of PhIF is shown. Cells containing ptevF-PhIF and pTac-TEV were grown at different concentrations of IPTG for 6 hours and the resulting RFP fluorescence tracked by flow cytometry. In all panels, error bars represent the standard deviation of three experiments performed in different days.

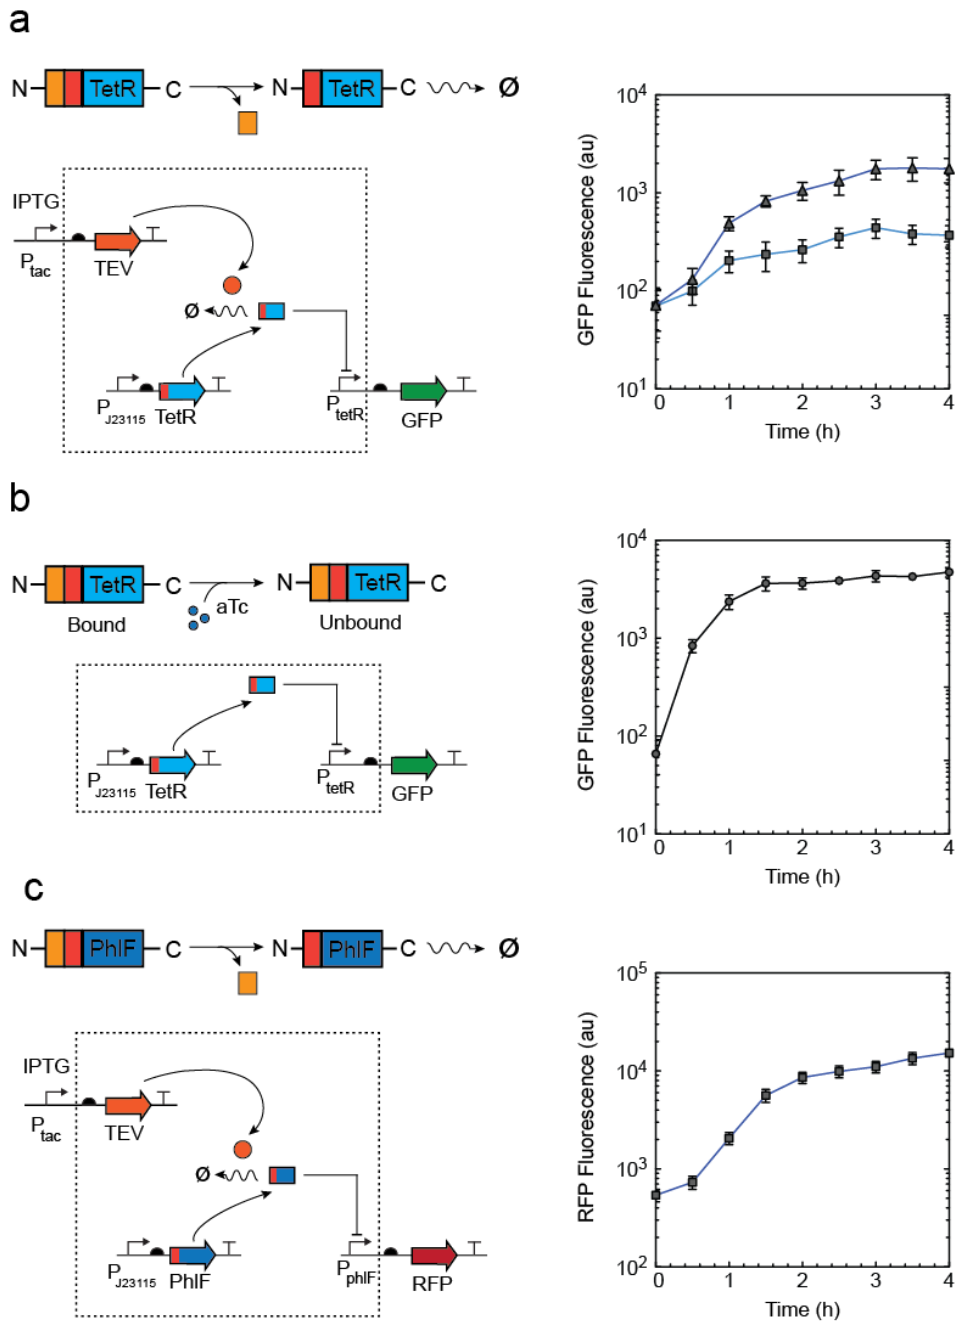

**Supplementary Figure 2: Time course analysis of degron-activated circuits. (A)** Cells containing ptevF-TetR (deep blue, triangles) or ptevY-TetR (light blue, squares) in the presence of pTac-TEV were induced with 2 mM IPTG and their fluorescence tracked by flow cytometry every hour. **(B)** Cells containing ptevF-TetR only were treated with 100 ng/mL anhydrotetracycline (aTc) and their fluorescence tracked by flow cytometry every hour. **(C)** Cells containing ptevF-PhlF and pTac-TEV were induced with 2 mM IPTG and their fluorescence tracked by flow cytometry every hour. In all panels, error bars represent the standard deviation of three experiments performed in different days.

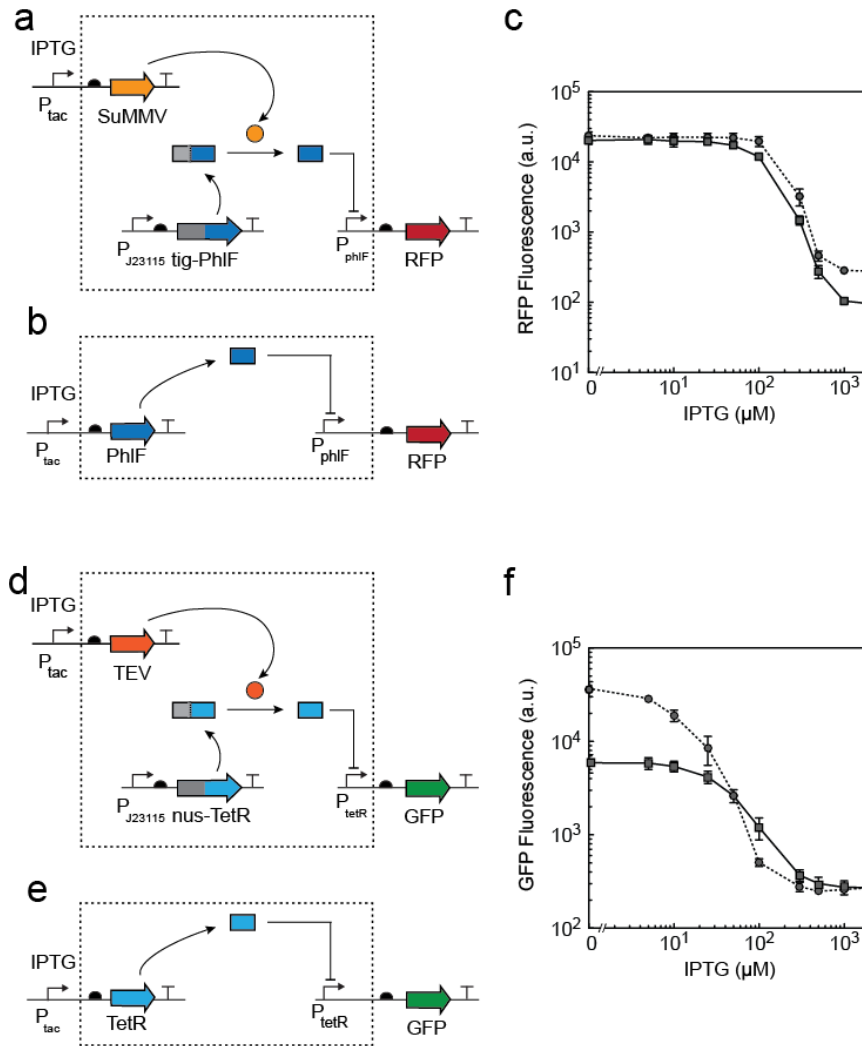

**Supplementary Figure 3: Controlled release of PhIF and TetR compared to  $P_{tac}$  induction. (A)** A schematic of controlled release of PhIF mediated by SuMMV is shown. **(B)** A schematic of a  $P_{tac}$  inducible PhIF circuit is shown. **(C)** The response function for the SuMMVp-mediated controlled release of PhIF (solid line, squares) as compared to PhIF expressed from a  $P_{tac}$  promoter (dashed line, circles) (1). Cells containing pTig-PhIF and pTac-Su or  $P_{tac}$ -PhIF were grown at different concentrations of IPTG for 6 hours and the resulting RFP fluorescence tracked by flow cytometry. **(D)** A schematic of controlled release of TetR mediated by TEV is shown. **(E)** A schematic of a  $P_{tac}$  inducible TetR circuit is shown. **(F)** The response function for the TEVp-mediated controlled release of TetR (solid line, squares) as compared to TetR expressed from a  $P_{tac}$  promoter (dashed line, circles) (1). Cells containing pNus-TetR and pTac-TEV or  $P_{tac}$ -TetR were grown at different concentrations of IPTG for 6 hours and the resulting GFP fluorescence tracked by flow cytometry. Error bars represent the standard deviation of three experiments performed in different days.

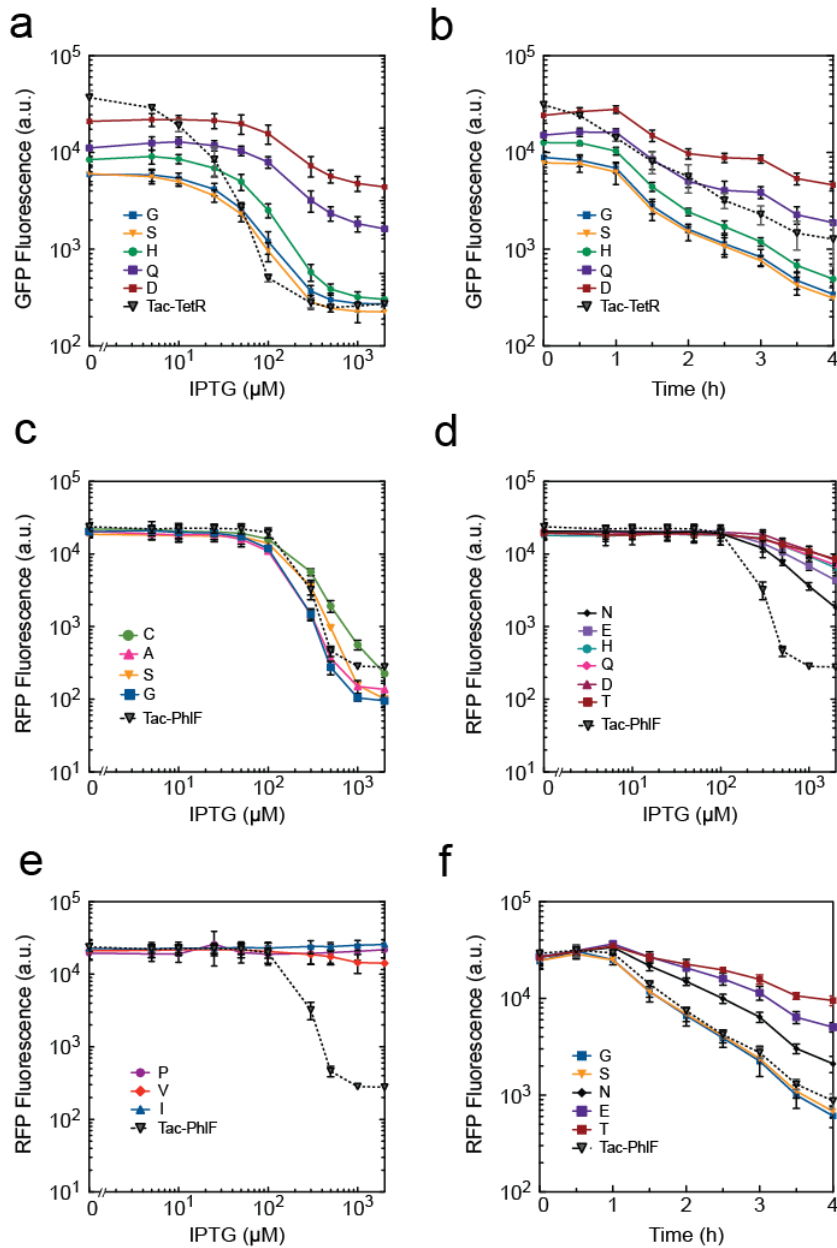

**Supplementary Figure 4** Effect of the P1' position on the cleavage efficiency. **(A)** IPTG titration of cells containing NusA-tevX-TetR, where X corresponds to a different residue at the tev-P1' position, in the presence of pTac-TEV. The transfer function of pTac-TetR is shown for comparison (dashed black line). **(B)** Time course analysis of the cells shown in (A). **(C), (D), (E)** IPTG titration of cells containing TF-summvX-PhIF, where X corresponds to a different residue at the summv-P1' position, in the presence of pTac-Su. Residues were classified as 'optimal' (C), 'medium' (D) and 'non-cutters' (E). The transfer function of pTac-PhIF is shown for comparison (dashed black line). **(F)** Time course analysis of a subset of P1' variants shown in (C) and (D). Error bars represent the standard deviation of three experiments performed on different days.

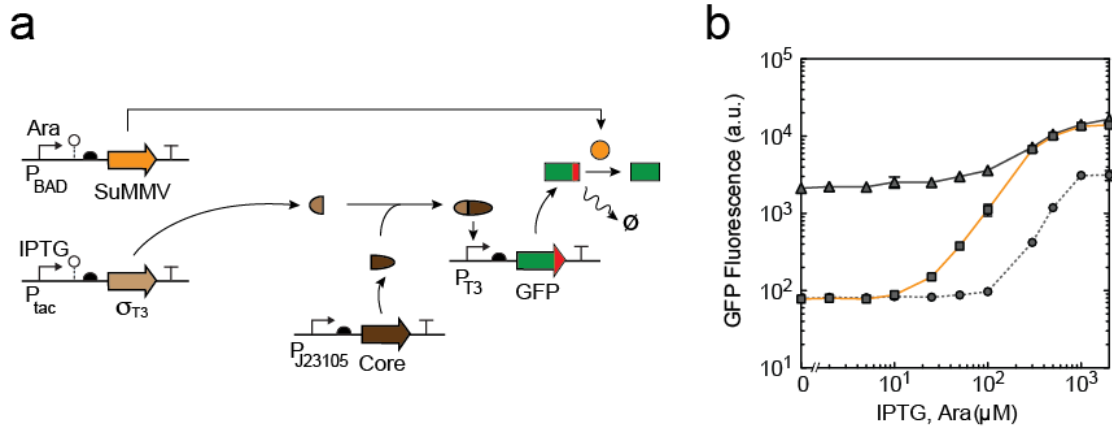

**Supplementary Figure 5: Increase of dynamic range by decoupled expression of SuMMV from main circuit. (A)** A schematic of degradation rescue with expression of the SuMMV protease under the control of  $P_{BAD}$  (independent of the main circuit) implemented into the original IPTG-inducible  $\sigma_{T3}$  polymerase system. Red squares, C-terminal degradation tag. o-- symbol, BydVJ ribozyme (SuMMV) and RiboJ ribozyme (T3) (2, 3). **(B)** Response functions of the circuit shown in (A). Cells carrying pCore, pTac-T3, pT3-GFP-LVA and pBAD-Su were grown at different concentrations of IPTG and arabinose for 8 hours and the fluorescence tracked by flow cytometry. Solid grey line, triangles, original split-polymerase system without SuMMV protease and untagged GFP. Dashed grey line, circles, split-polymerase system with degen-tagged GFP output induced with IPTG only. Orange line, the circuit shown in (A) induced with both IPTG and arabinose. Error bars correspond to the standard deviation of three experiments performed on different days.

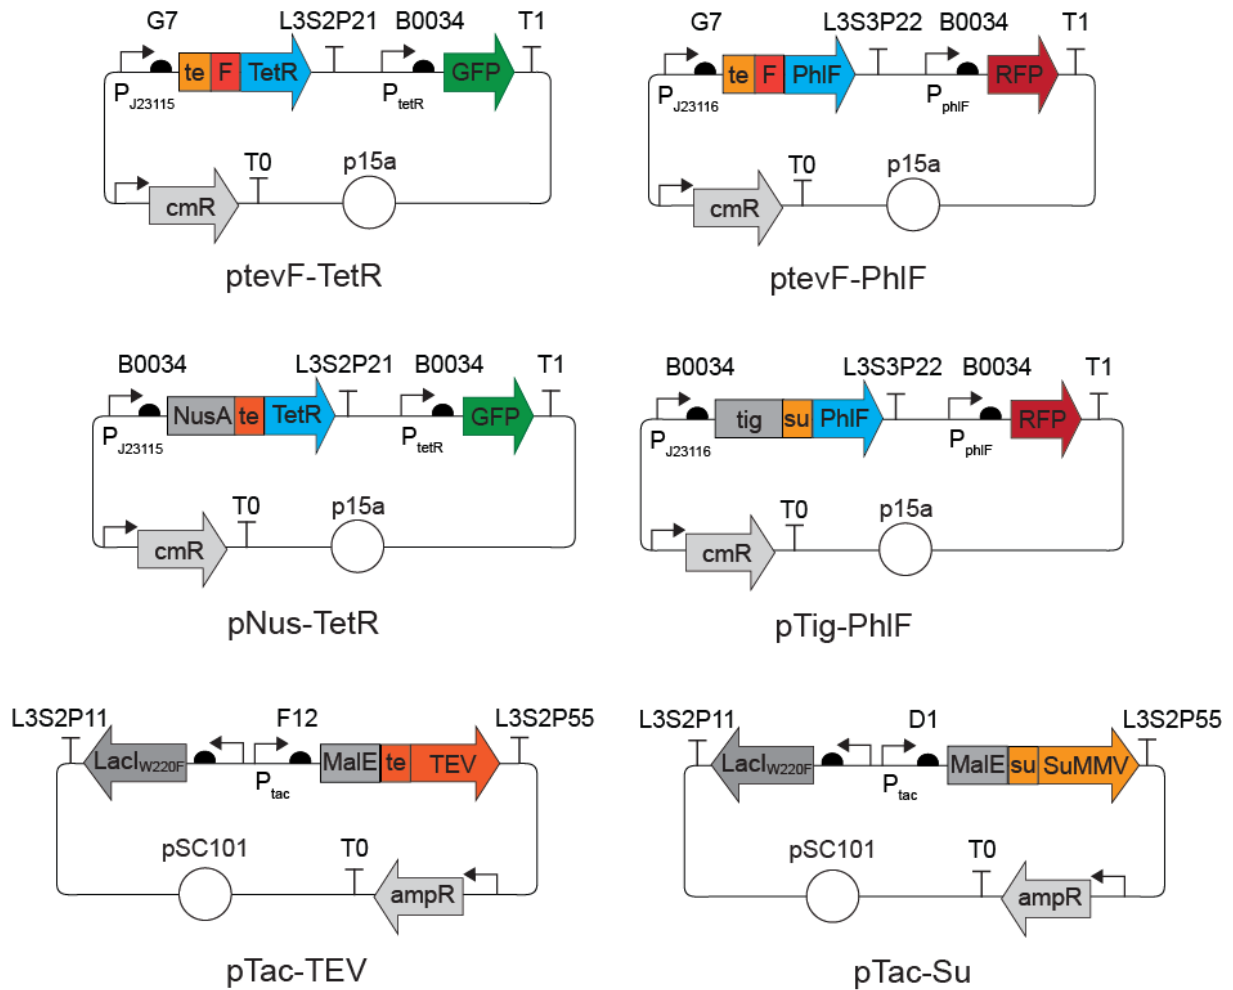

**Supplementary Figure 6** Plasmid maps used in controlled degradation and release experiments. **Top row**, the plasmids for controlled degradation are shown. **Middle row**, the plasmids for controlled repressor release are shown. *Nus*, NusA protein (4); *Tig*, trigger factor protein (4); *su*, SuMMVp site. **Bottom row**, the plasmids used to control the expression of TEVp and SuMMVp are shown. *Lacl<sub>W220F</sub>*, a variant of *Lacl* with lower leakage (5). *F*, degron FLVQ (6); *te*, TEVp cleavage site; *su*, SuMMVp cleavage site. In all figures, promoters are depicted by arrows; RBS are shown as solid semicircles; terminators are represented by T symbols.

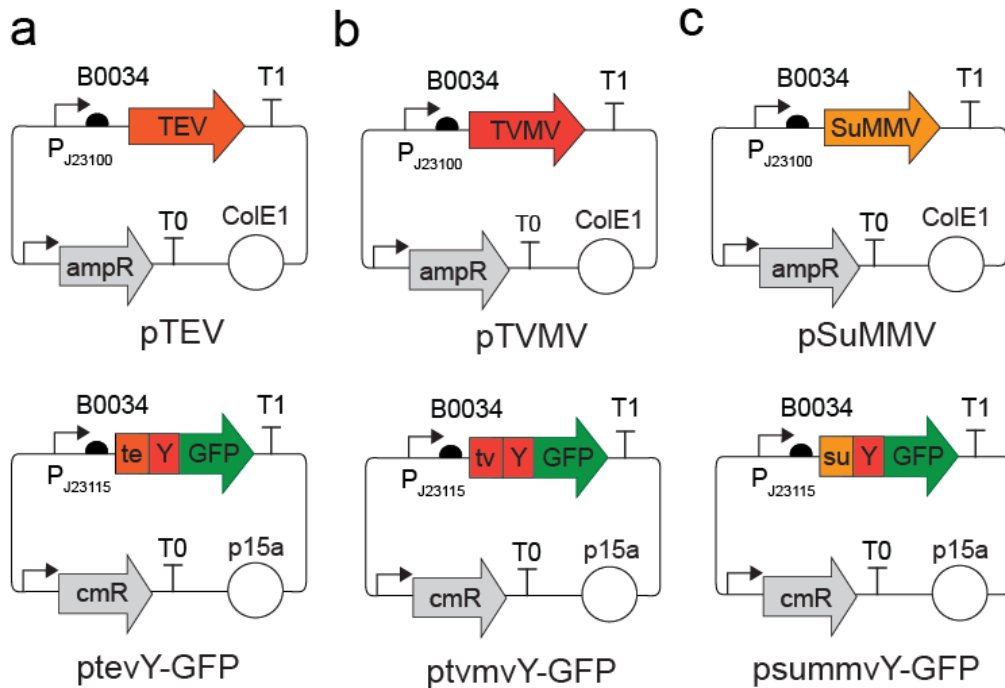

**Supplementary Figure 7**

**Plasmid maps used in the *Potyvirus* orthogonality experiments. Top**

**row,** the plasmids encoding constitutively expressed, codon-optimized proteases. **Bottom row,** the cognate reporter plasmids for each protease. Y, degron YLFVQ (6); *te*, TEVp cleavage site; *tv*, TVMVp cleavage site; *su*, SuMMVp cleavage site. In all figures, promoters are depicted by arrows; RBS are shown as solid semicircles; terminators are represented by T symbols.



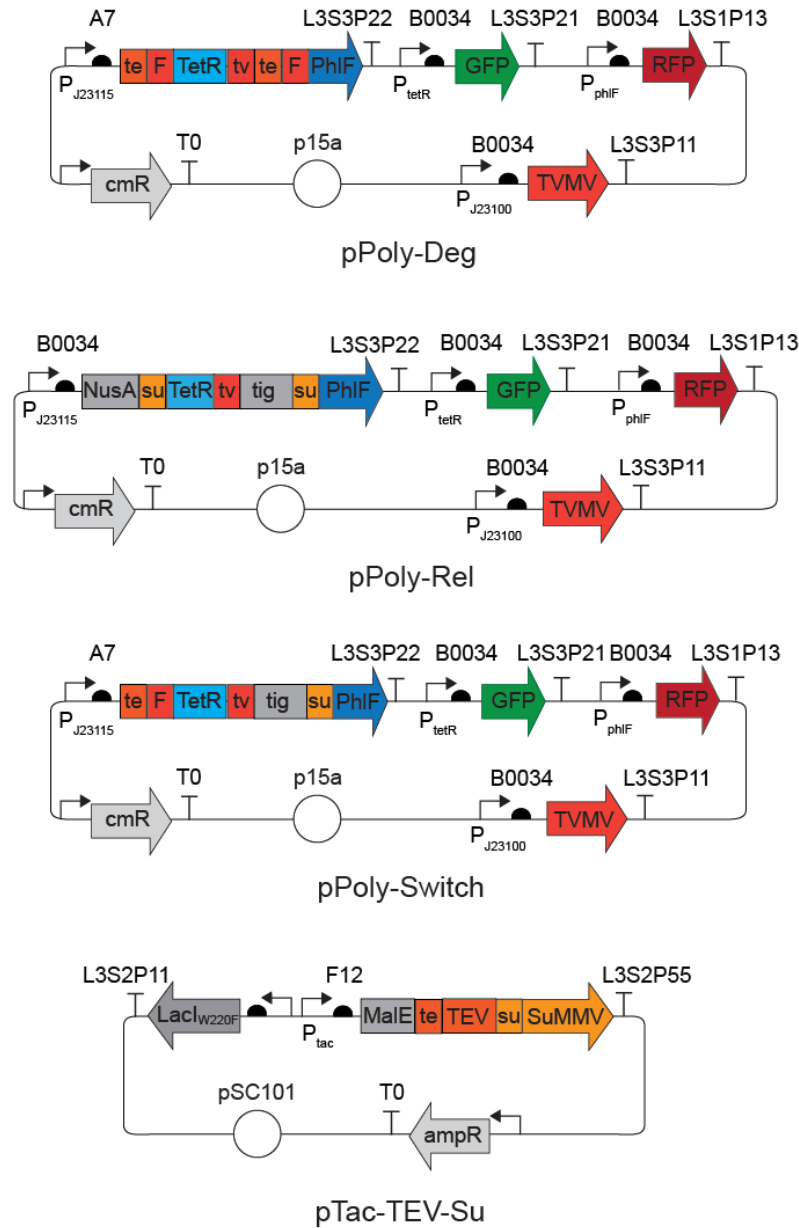

**Supplementary Figure 8** Plasmid maps used in the polyrepressor experiments. **Top row**, the plasmid for double degradation of TetR and PhIF; **second row**, the plasmid for double release of TetR and PhIF; **third row**, the plasmid for degradation of TetR and release of PhIF; **bottom row**, the plasmid expressing TEVp and SuMMVp as a polyprotein is shown. *te*, TEVp cleavage site; *tv*, TVMVp cleavage site; *su*, SuMMVp cleavage site; *F*, FLVQ-degron (6); *Nus*, NusA protein (4); *Tig*, trigger factor protein (4). Promoters are depicted by arrows; RBS are shown as solid semicircles; terminators are represented by T symbols.

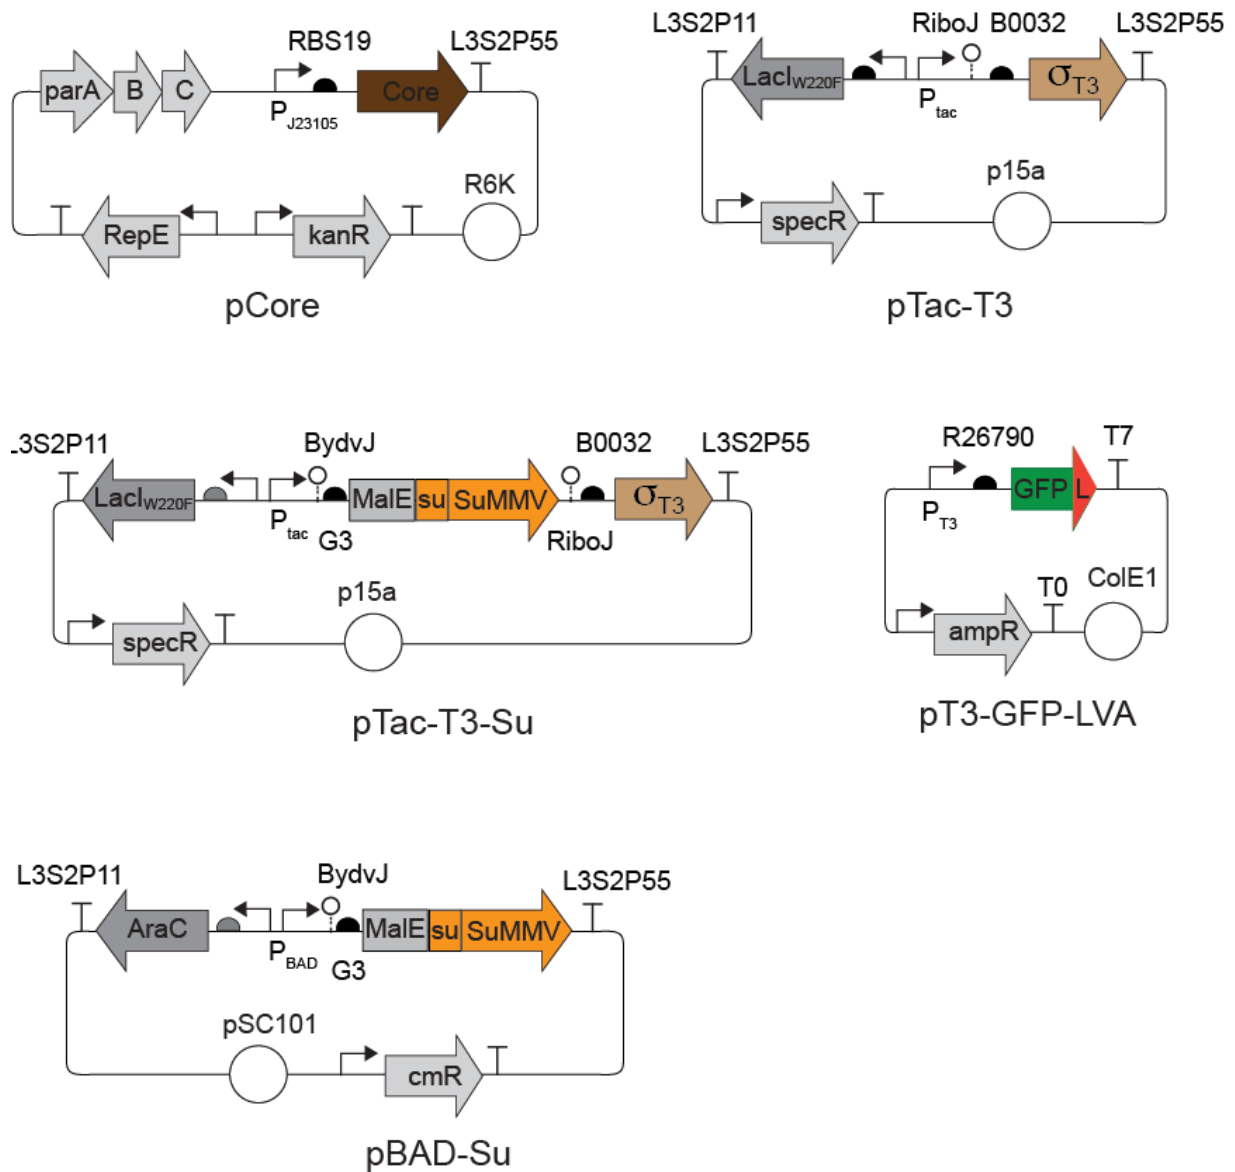

**Supplementary Figure 9** Plasmid maps used in the degradation rescue experiments. Top row, the plasmids for the expression of the basic split polymerase components are shown (7). Middle row, left, the plasmid containing the controller protease (SuMMVp) and the sigma T3 fragment is shown. *su*, SuMMVp cleavage site. Right, reporter plasmid. *L*, *ssrA* C-terminal tag LVA (8). Bottom row, the plasmid containing the protease SuMMV decoupled from the main circuit under the control of  $P_{BAD}$  is shown. Promoters are depicted by arrows; RBS are shown as solid semicircles; terminators are represented by T symbols; the  $\circ$  symbol shows the *BydvJ* or *RiboJ* ribozymes (2, 3). Genetic parts follow SBOLv format (23).

**Table S1.** Genetic parts used in this study

| Part name           | Type          | DNA sequence                                                                                                                                                                                                                                                                                                                                                                                                                                                                                                                                                                                                                                                                                                                                                                   | Ref.                              |
|---------------------|---------------|--------------------------------------------------------------------------------------------------------------------------------------------------------------------------------------------------------------------------------------------------------------------------------------------------------------------------------------------------------------------------------------------------------------------------------------------------------------------------------------------------------------------------------------------------------------------------------------------------------------------------------------------------------------------------------------------------------------------------------------------------------------------------------|-----------------------------------|
| P <sub>J23100</sub> | Promoter      | ttgacggctagctcagtcctaggtacagtgtctagc                                                                                                                                                                                                                                                                                                                                                                                                                                                                                                                                                                                                                                                                                                                                           | (10)                              |
| P <sub>J23115</sub> | Promoter      | tttatagctagctcagcccttggtacaatgctagc                                                                                                                                                                                                                                                                                                                                                                                                                                                                                                                                                                                                                                                                                                                                            | (10)                              |
| P <sub>J23116</sub> | Promoter      | ttgacagctagctcagtcctagggactatgctagc                                                                                                                                                                                                                                                                                                                                                                                                                                                                                                                                                                                                                                                                                                                                            | (10)                              |
| P <sub>J23105</sub> | Promoter      | tttacggctagctcagtcctaggtactatgctagc                                                                                                                                                                                                                                                                                                                                                                                                                                                                                                                                                                                                                                                                                                                                            | (10)                              |
| P <sub>tetR</sub>   | Promoter      | tcctatcagtgatagagattgacatccctatcagtgatagatataatgagc<br>ac                                                                                                                                                                                                                                                                                                                                                                                                                                                                                                                                                                                                                                                                                                                      | (1)                               |
| P <sub>phIF</sub>   | Promoter      | tctgattcgtttaccaattgacatgatcgaaacgtaccgtatcgttaaggt                                                                                                                                                                                                                                                                                                                                                                                                                                                                                                                                                                                                                                                                                                                            | (1)                               |
| P <sub>lac</sub>    | promoter      | tgttgacaattaatcatcggctcgtataatgtgtggaattgtgagcgtcac<br>aatt                                                                                                                                                                                                                                                                                                                                                                                                                                                                                                                                                                                                                                                                                                                    | (1)                               |
| P <sub>BAD</sub>    | Promoter      | gaaccaattgtccatattgcatcagacattgcccgtcactgctcttttact<br>ggctcttctcgttaaccaaacggtaaccccgttattaaaagcatctcgtgta<br>acaaagcggggaccacaaagccatgacaaaaacgctaacaaaagtgtctataat<br>cacggcagaaaagtcacattgattattgacggcgtcacactttgctatg<br>ccatagcatttttaccataagattagcggatcctacctg                                                                                                                                                                                                                                                                                                                                                                                                                                                                                                          | (11)                              |
| P <sub>T3</sub>     | Promoter      | taataaccctcactatagggaga                                                                                                                                                                                                                                                                                                                                                                                                                                                                                                                                                                                                                                                                                                                                                        | (7)                               |
| B0034               | RBS           | aaagaggagaaa                                                                                                                                                                                                                                                                                                                                                                                                                                                                                                                                                                                                                                                                                                                                                                   | (12)                              |
| B0032               | RBS           | tcacacaggaag                                                                                                                                                                                                                                                                                                                                                                                                                                                                                                                                                                                                                                                                                                                                                                   | (12)                              |
| G7                  | RBS           | tttaaagaggagcaaggtacca                                                                                                                                                                                                                                                                                                                                                                                                                                                                                                                                                                                                                                                                                                                                                         | this study                        |
| A7                  | RBS           | tttaaagaggagaaagctacca                                                                                                                                                                                                                                                                                                                                                                                                                                                                                                                                                                                                                                                                                                                                                         | this study                        |
| F12                 | RBS           | ctaaagactagcctttcaatcaggaattcccagg                                                                                                                                                                                                                                                                                                                                                                                                                                                                                                                                                                                                                                                                                                                                             | this study                        |
| D1                  | RBS           | ctaaagactaccctttcaatcagggattcccagg                                                                                                                                                                                                                                                                                                                                                                                                                                                                                                                                                                                                                                                                                                                                             | this study                        |
| RBS19               | RBS           | tactagagtcatttatgaaagtactag                                                                                                                                                                                                                                                                                                                                                                                                                                                                                                                                                                                                                                                                                                                                                    | (7)                               |
| R26790              | RBS           | tgtcaatttcccgatagaggaggtaaag                                                                                                                                                                                                                                                                                                                                                                                                                                                                                                                                                                                                                                                                                                                                                   | (7)                               |
| T1                  | Terminator    | ggcatacaataaaaacgaaaaggctcagtcgaaagactggccttctgttttat<br>ctgtttgttctgctggaacgctctcctgagtaggacaaatccgccccctag<br>a                                                                                                                                                                                                                                                                                                                                                                                                                                                                                                                                                                                                                                                              | (12)                              |
| T7                  | Terminator    | tagcataaacccttggggcctctaaacgggtcttgaggggttttttg                                                                                                                                                                                                                                                                                                                                                                                                                                                                                                                                                                                                                                                                                                                                | (7)                               |
| L3S2P21             | Terminator    | ctcgggtaccaaatccagaaaagggcctcccgaagggggcctttttctg<br>ttttgttc                                                                                                                                                                                                                                                                                                                                                                                                                                                                                                                                                                                                                                                                                                                  | (13)                              |
| L3S3P22             | Terminator    | ccaattattgaagccgctaacggcctttttttgtttctggtctccc                                                                                                                                                                                                                                                                                                                                                                                                                                                                                                                                                                                                                                                                                                                                 | (13)                              |
| L3S3P21             | Terminator    | ccaattattgaagccctccctaacggggcctttttttgtttctggtctcc<br>c                                                                                                                                                                                                                                                                                                                                                                                                                                                                                                                                                                                                                                                                                                                        | (13)                              |
| L3S1P13             | Terminator    | gacgaacaataaaggcctccctaacggggccttttttattgataacaaaa                                                                                                                                                                                                                                                                                                                                                                                                                                                                                                                                                                                                                                                                                                                             | (13)                              |
| L3S3P11             | Terminator    | ccaattattgaacacccttcggggtgtttttttgtttctggtctccc                                                                                                                                                                                                                                                                                                                                                                                                                                                                                                                                                                                                                                                                                                                                | (13)                              |
| L3S2P11             | Terminator    | ctcgggtaccaaatccagaaaagagacgctttcagcgtctttttctgtttt<br>ggtcc                                                                                                                                                                                                                                                                                                                                                                                                                                                                                                                                                                                                                                                                                                                   | (13)                              |
| L3S2P55             | Terminator    | ctcgggtaccaaaagacgacaataaagacgctgaaaagcgtctttttctgtttt<br>ggtcc                                                                                                                                                                                                                                                                                                                                                                                                                                                                                                                                                                                                                                                                                                                | (13)                              |
| BydvJ               | Insulator     | ggtgtctcaaggtgcttaccttgactgatgagtcgaaaggacgaaacacc                                                                                                                                                                                                                                                                                                                                                                                                                                                                                                                                                                                                                                                                                                                             | (3)                               |
| RiboJ               | Insulator     | ctgtcaccggatgtgcttccggctgatgagtcgagggacgaaacag                                                                                                                                                                                                                                                                                                                                                                                                                                                                                                                                                                                                                                                                                                                                 | (2)                               |
| YFLVQ               | N-degron      | tatctgtttgtgcag                                                                                                                                                                                                                                                                                                                                                                                                                                                                                                                                                                                                                                                                                                                                                                | (6)                               |
| FLFVQ               | N-degron      | ttcttattcgtgcaa                                                                                                                                                                                                                                                                                                                                                                                                                                                                                                                                                                                                                                                                                                                                                                | (6)                               |
| LVA                 | C-degron      | gcagcgaacgacgaaaactatgccctggtagcc                                                                                                                                                                                                                                                                                                                                                                                                                                                                                                                                                                                                                                                                                                                                              | (8)                               |
| TEV ENLYFQ          | Protease site | gaaaacctgtattttcag                                                                                                                                                                                                                                                                                                                                                                                                                                                                                                                                                                                                                                                                                                                                                             | (14)                              |
| TVMV ETVRFQ         | Protease site | gaaaccgtgctgttcag                                                                                                                                                                                                                                                                                                                                                                                                                                                                                                                                                                                                                                                                                                                                                              | (15)                              |
| SuMMV EEIHLQ        | Protease site | gaagaaattcatctgcag                                                                                                                                                                                                                                                                                                                                                                                                                                                                                                                                                                                                                                                                                                                                                             | (16)                              |
| tev                 | gene          | ggagaagcttggctttaaagggcgcgctgattacaaccgatctcagcacc<br>tttgtcatttgacgaatgaatctgatgggcacacacatcgttggatggtat<br>tggatttggctcgttcatcattacaataaagcacttgtttcgtcgcataaat<br>ggactctgttggccaatcactgcatggtgattcaaggtcaagaacacca<br>cgaacttgcacaacacccctcattgatggcgcgacatgatcattatcgcat<br>gctaaggatttcccaccatttctcaaaagctgaaatttctgtgagccaca<br>cgtgaagagcgcatttgtcttgtgacaaccaacttccaaactaagagcattg<br>ctagcattggtgtcagacacttagttgcacattccctcattctgatggcattct<br>ctggaagcattggattcaaaacaggtggcaggtggtggttggcgtttaaagt<br>tcaactcgcgatgggttcatgttggatccactcagcattcgaattcacc<br>acacaacaattatttcaaacgctgcccgaaaaacttcatggaattggtgac<br>aaatcaggagggcgcagcaggtgggttagtgggttggcgtttaaagtgcactca<br>gtatttggggggccataaagtttctatggtgaaacctgaagagcctttt<br>agccagtttaaggaagcgaactcaactcatgaat | this study <sup>1</sup> ,<br>(17) |
| tvmv                | gene          | tctaaaagcttggctgaaagggcgtgcccgtattttaaactccgatctctgctg<br>tatgctgctggaaaactcctcggatggtcatagtgacgtctgttggcat<br>tggttttggccgtatattcattgccaacagcactctgttctcgtgtaaaact<br>ggcgaactgacctcaaaacctgcatggtgattcaaggtcaaaaactc<br>cccagctcagatgaaaccggttgaagggcgtgacattatcgttatcaaaat<br>ggctaagacttcccgcgttcccgcagaaactgaaattcctgcagccgacc<br>atcaaaagctggtgctgcatggtgtccaccaacttccagcagaaaagcgtc<br>cgagcctggtgtcgaatcctctcactattgtgcataaagaagacacttctt<br>ctggcagcactggatcaccactaaagatggcaggtggtgagccactggtt<br>tccatcattgaggcaacattctggcattccacagcctgactcacaaccaca<br>acggtagcaactactcgtggaatttccggaaaacttctggtgagcattatct<br>ggatgcccggtggttgggtgcaaaaactggaattcaaacgggataaaatc<br>agctggggttcccttaccctggttga                                                                     | this study <sup>1</sup> ,<br>(15) |
| summv               | gene          | ggtgtgtctctgagtcgtggtgtgctgactataacgcaattagtagcatgg                                                                                                                                                                                                                                                                                                                                                                                                                                                                                                                                                                                                                                                                                                                            |                                   |

|              |      |                                                                                                                                                                                                                                                                                                                                                                                                                                                                                                                                                                                                                                                                                                                                                                                                                                                                                                                                                                                                                                                                                                                             |                                   |
|--------------|------|-----------------------------------------------------------------------------------------------------------------------------------------------------------------------------------------------------------------------------------------------------------------------------------------------------------------------------------------------------------------------------------------------------------------------------------------------------------------------------------------------------------------------------------------------------------------------------------------------------------------------------------------------------------------------------------------------------------------------------------------------------------------------------------------------------------------------------------------------------------------------------------------------------------------------------------------------------------------------------------------------------------------------------------------------------------------------------------------------------------------------------|-----------------------------------|
|              |      | <p>tttgtcgcgtgaccaacgattccgggttctagctctaccaccatgtaocggtat<br/> tgggttacggctgttataatcatcaccacaacacttgttccgtgaaaaataac<br/> ggcgcgtctcgttatcacttctcaccacgcgaatacatttgcaaaaatcccg<br/> cgtctcttaaactgtctctgggttccgggtcgcgataatgctgctgacccgtct<br/> tccgaaagattgcccaccgttcccagcaaacactcaagtccgcgaaccgagc<br/> agcgaagaaaaagcgggtgcttgttaccacttccaggaaaaaacactgt<br/> cttctatggtttcggaaagcagctgcggtgtacagcgtgaagacttccgat<br/> ttggcgtcatggatctccaccaaatgggtcattgtggcgcgccgcatcgta<br/> tctattcgtgacgggttacatcatgggttctcactgcggtgagaaccggatga<br/> ctagcaacttcttccaccagcatccctaaagatttccagaacctgctgaatgg<br/> taaaagagcaacgagtggtgggttccgggtggaagtacaacatcgacgcggt<br/> tgtgggggtgcctgagcgtgttaacgacgcgccgagcgaaccttcatca<br/> ccgcaaaagtgtgagcgcctggacaccgagggtatcaaaagtccag</p>                                                                                                                                                                                                                                                                                                                                                | this study <sup>1</sup> ,<br>(16) |
| <i>sfGFP</i> | gene | <p>atgagcaagggagaagaacttttcaactggagttgtcccaattcttggta<br/> tagatgggtgatgtaatgggcacaaaatttctgtccggtggaggggtgaagg<br/> tgatgctacaacggaaaactcacccttaatttatttgcactactggaaaa<br/> ctacctgttccgtggccaacacttgcactactctgacctatgggttccaat<br/> gcttttccgggtatccggatcacatgaaacggcatgacttttcaagagtgc<br/> catgcccgaaggttatgtacaggaacgactatcttcaaaagtacgggg<br/> acctacaagacgcggtgtaagtcaagtttgaaggtgataccctgttcaatc<br/> gtatcgagttaaaggttatgttttaaaagagatggaacatcttggaca<br/> caaacctogagtacaactttaactcacacaatgtatacatcacgcgacgaca<br/> caaaagaatggaatcaaaagtaacttcaaaatccgcaaacggttgaagatg<br/> gttccgttcaactagcagaccttatcaacaaaactccaattggcgatgg<br/> ccctgtcctttaccagcaaccattacctgtcgacacaactgtctcttcg<br/> aaagatcccaacgaaaagcgtgaccacatggctccttcttgagtttgaactg<br/> ctgctgggatatacactggcatggatgagctctacaataa</p>                                                                                                                                                                                                                                                                                                                 | (18)                              |
| <i>mRFP1</i> | gene | <p>atggcttctccggaagcgttatcaaaagtttcaactgcttcaaaagttcgta<br/> tggaaaggttccgttaacgggtcacgagttcgaatcgaaggtgaaggtgaagg<br/> tcgctcgtacgaaggtaccagaccgtcaaacgaaagttaccaaaaggtggt<br/> ccgtgcccgttcgcttggacatcctgtccccgcagtccagtcaggtcca<br/> aagcttacgttaaacaccggctgacatccccgactacctgaaactgtcctt<br/> cccggaaagtttcaaatgggaacggttatgaactcgaagacgggtgggtgt<br/> gttaccgttaccagactcctcctgcgaagcgggtgagttcatctacaag<br/> ttaaactcgggtgtaccaacttcccgtccgacgggtcgggttatgcagaaaa<br/> aacctatgggttgggaagcttccaccgaacgtatgtaccggaagacgggtgt<br/> ctgaaaaggtgaaatcaaaatgcgtctgaaactgaaagacgggtggctactacg<br/> acgctgaagttaaaaccacctacatgggttaaaaaaccggttcagctgcccgg<br/> tcttacaacaccgacatcaaacctggacatcacctcccacaacgaagactac<br/> accatcgttgaacagtacgaacgtgctgaaggtcgtcactccaccgggtctt<br/> aataa</p>                                                                                                                                                                                                                                                                                                                                   | (19)                              |
| <i>tetR</i>  | gene | <p>atcgaagaaggtaaactggttaagcgggtgaaacctgtattttcagtatctgt<br/> ttgtgaggaactggtggcgagcgcgaaatccagatagataaaaagtaaaagt<br/> gattaaacagcgcattagagctgcttaatgaggtcggaaatcgaaggtttaa<br/> accgttaaacctgcccagaagctaggtgtagagcagcctacattgtattggc<br/> atgtaaaaaataagcgggttctgctgacgccttagccattgagatgtaga<br/> taggcaccatactcacttttgccctttagaaggggaaagctggcaagatttt<br/> ttacgttaataaccgtaaaaagtttagatgtgcttactaagtcacgcgag<br/> gagcaaaagtacatttaggtacacggcctacagaaaaacagtatgaaactc<br/> cgaaaatcaattagcctttttagcacaacaggttttccactagagaatgca<br/> ttatagcactcagcgtgtggggcatttactttaggttgctgtatggaaag<br/> atcaagagcatcaagtgcgtaaaagaagaaggaaacacctactactgatag<br/> tatgcccattattacgacaagctatcgaattatttgatcaccaaggtgca<br/> gagccagcctcttattcggccttgaaatgcatatagcggattgaaaaaac<br/> aactaaatgtgaaagtgggtcc</p>                                                                                                                                                                                                                                                                                                                         | (1)                               |
| <i>phIF</i>  | gene | <p>gcacgtaccgccgagcgtgacgacattggtagcctgctgtagtccgcataccc<br/> ataaagcaattctgaccagcaccattgaaatcctgaaagaatggtgttatag<br/> cggctgagcattgaaagcgttgacgctgctgcccgtgcaagcaaacgacc<br/> attatcgtttggtggaccaataaagcagcactgatgcccgaaggtatgaaa<br/> atgaaagcgaacaggtgctgtaaatcccgatctgggtgactttaaagccga<br/> cttgattttctgctgctgtaaatctgtgaaagtttggcgtgaaacacctttgt<br/> ggtgaaagctttcgtgtgttatgacagaagcacagctggaccctgcaacc<br/> tgaccagctgaaagatcagtttatggaacgctgctgtagatgcccgaaaaa<br/> actggttgaaaatgccattagcaatggtgaaactgccgaaagataccaactcgt<br/> gaactgctgctgatatgattttgggttttgggtatcgccctgctgaccg<br/> aacagctgaccgtgaaacaggtatgaaagaatttaocttccctgctgattaa<br/> tgggttttgcgggttacacagcgt</p>                                                                                                                                                                                                                                                                                                                                                                                                                                     | (1)                               |
| <i>malE</i>  | gene | <p>atcgaagaaggtaaactggttaactcggattaacggcgataaaaggctataacg<br/> gtctcgtgaagtcggttaagaaatcggagaagataccggaataaagtccac<br/> cgttgagcatccggataaaactggaagagaaatccccacaggttgcggcaact<br/> ggcgtggccctgacatatactctgtggcacacagcaccgctttgggtactacg<br/> ctcaatctggcctgttggctgaaatcaccgccgacaagcgttccaggacaa<br/> gctgtatccgttactcgggtgacctacgttacaacggcaagctgatgtgt<br/> taccgactgctgttgaagcgttatcgtgatttatacaaaagatctgctgc<br/> cgaaaccgcaaaaacctgggaagagatcccggcgtggataaaagactgaa<br/> agcgaaggttaagagcgcgctgatgtcaacctgcaagaaccgtacttcaacc<br/> tggccgctgattgctgctgacgggggttatgcgttcaagtatgaaaacggca<br/> agtacgacataaagacgtggcggtgataaacgctggcgcgaaagcgggtct<br/> gacctcctgggtgacctgattaaaacaacacatgaatgcagacaccgat<br/> tactccatcgcaagctgcttataaaaggcgaacacggatgaccatca<br/> acggccctggcgtggcacaacatcgacaccagcaaaagtgaattatgggt<br/> aacggctactgccgacctcaaggggtcaaccatccaaccggttcgttggcgtg<br/> ctgagcgcaggtatcaacgcccagctccgaacaaagcgtggcgaagaggt<br/> ctcctgaaaactatctgctgactgatgaaggtctggaagcgggttaataaaga<br/> caaacgctgggtgcccgtagcgtgaggtcttacgaggaaggttggcgaaa<br/> gatccacgtattgccgccacctggaaaacgccgaaaggtgaaatcatgc</p> | (4)                               |

|                             |      |         |                                                                                                                                                                                                                                                                                                                                                                                                                                                                                                                                                                                                                                                                                                                                                                                                                                                                                                                                                                                                                                                                                                                                                                                                                                                                                                                                                                                                                                                                                                                                                                                                                                   |
|-----------------------------|------|---------|-----------------------------------------------------------------------------------------------------------------------------------------------------------------------------------------------------------------------------------------------------------------------------------------------------------------------------------------------------------------------------------------------------------------------------------------------------------------------------------------------------------------------------------------------------------------------------------------------------------------------------------------------------------------------------------------------------------------------------------------------------------------------------------------------------------------------------------------------------------------------------------------------------------------------------------------------------------------------------------------------------------------------------------------------------------------------------------------------------------------------------------------------------------------------------------------------------------------------------------------------------------------------------------------------------------------------------------------------------------------------------------------------------------------------------------------------------------------------------------------------------------------------------------------------------------------------------------------------------------------------------------|
|                             |      |         | <p>cgaacatcccgcagatgtccgctttctggatgcccgtgactgcccgtgat<br/>caacgccgcagcggctgctcagactgtcgtatgaagccctgaaagacgcgcag<br/>actcgtatcaccaag</p>                                                                                                                                                                                                                                                                                                                                                                                                                                                                                                                                                                                                                                                                                                                                                                                                                                                                                                                                                                                                                                                                                                                                                                                                                                                                                                                                                                                                                                                                                           |
| <i>nusA</i>                 | gene | (4)     | <p>aacaaagaaatTTGGCTGTAGTTGAAGCGGTATCCAATGAAAGGCGCTAC<br/>CTCGGAGAAGATTTTCGAAGCATTGGAAGCGCGCTGGCGACAGCAACAAA<br/>GAAAAATATGAACAAGAGATCGACGTCGCGTACAGATCGATCGAAAAAG<br/>GGTGTATTTGACACTTCCGTCGCTGGTTAGTTGTTGATGAAGTACCCGAC<br/>CGACCAAGGAAATCACCOCTGAAGCGCACGTTATGAAGATGAAAGCCTGAA<br/>CCTGGGCGATTACGTTGAAGATCAGATTGAGTCTGTACCTTTGACCGTAC<br/>ACTACCCAGACGGCAAAACAGGTTATCGTGCAGAAAAGTGCCTGAAAGCCGAA<br/>GTGCGATGGTGGTTGATCAGTTCCGTTGAACACGAAGTGAATCATCACCG<br/>CGTGGTGA AAAAGTAAACCGCGACAACATCTCTCTGGATCTGGGCAACAAC<br/>GCTGAAGCCGTGATCCTGCGCGAAGATATGCTGCCGCGTGA AAAACTTCCG<br/>CTGGCGACCGCGTTCGTGGCGTGTCTATTCGTTCCGCGGAAAGCGCTGG<br/>CGCGAAGTGTCTGCTACTGTTCCAAGCCGAAATGCTGATCGAAGTCTT<br/>CGTATTGAAGTCCAGAAAATCGGCGAAGAGTGATGAAATTAAGCAGCG<br/>CTCGGATCCGGTTCTCGTGCAGAAAATCGCGGTGAAAACCAACGATAAAC<br/>TATCGATCCGGTAGGTGCTGCGTAGGTATGCGTGGCGCGCTGTTCAGGCG<br/>GTGTCTACTGAAGTGGTGGCGAGCGATCGATATCGTCTGTGGGATGATA<br/>ACCGGCGCAGTTCGTGATTAACGCAATGGCACCGGCAGACGTTCGTTCT<br/>CGTGGTGGATGAAGATAAACACACCATGGATATCGCCGTGAAGCCGTTAAC<br/>CTGGCGAGGCGATTGGCGTAACGGTCAGAACGTGCGTCTGGCTTCGACG<br/>TGAGCGTTGGGAACCAACGTGATGACCGTTGACGACCTGCAAGGTAAGCA<br/>TCAGGCGGAAGCGCACGACGATCGACACCTTCAACAAAATATCTCGACATC<br/>GACGAAGACTTCGCGACTGTCTGGTGAAGAAGGCTTCTCGACGCTGAAG<br/>AATTGGCCTATGTCCGATGAAAGAGCTGTGGAATCGAAGCCTTGATGA<br/>GCCGACCGTTGAAGCACTGCGCGAGCGTCTAAAAATGCACTGGCCACCAT<br/>GCACAGGCCAGGAAGAAAACCTCGGTGATAACAAAACCGGCTGACGATCTG<br/>TGAACCTGAAGGGTAGATCGTGTATTGGCATCAAACTGGCCGCCGCTGG<br/>CGTTTGTACGCTGGAAGATCTCGCCGAACAGGCGATTGATGATCTGGCTG<br/>ATCGAAGGTTGACCGACGAAAAGCCGAGCAGCTGATTGGCTGCCGCTGA<br/>ATATTGCTGGTTCGGTGACGAAGCG</p> |
| <i>tig</i>                  | gene | (4, 20) | <p>caagtttcaggtgaaaccactcaaggccttggccgccgtgtaacgattacta<br/>tcgctgtgacagcatcgagaccgctgttaaaagcgagctggtaaccgttgc<br/>gaaaaaagtacgtattgacggcttccgcaaaaggcaagtgccaatgaatc<br/>gttgctcagcgttatggcgcgtctgtacgccaggacgttctgggtgacctga<br/>tgagccgtaacttcattgacgcatcattaaagaaaaaatcaatccggctgg<br/>cgaccgacttatgttccggcgaataacaagctgggtgaagacttcaactac<br/>tctgtagagtttgaagttatccggaagtgaactgcagggtctggaagcga<br/>tcgaagttgaaaaaccgatcgttgaagtgaccgacgtgacgttgacggcat<br/>cgtggatactctcgttaaacagcagcgacctggaagaaaaagacggcgt<br/>gttgaagcagaagaccgctgaacctcgacttcaaccggttctgtgacggcg<br/>aagagttcgaagcggtaaaagcgtatgattctgtactggcgtatggccaggg<br/>tcgtatgacccggcttgaagacggatcaaaagcccaaaagctggcga<br/>agttcaccatcgacgtgaccttcccggaagaataaccacgcagaaaaacctga<br/>aaggtaaagcagcgaatcgcctatcaacctgaagaagtgaagagcgtga<br/>actgccggaactgactgcagaattcatcaaacgttctggcgttgaagatgg<br/>tcgtagaagggtctgcgcgctgaagtgcgtaaaaacatggagcgcgagctga<br/>agagcgcctccgtaaccgcttaagtctcaggcgtatcgaaggtctggtaaa<br/>agctaacgacatcgacgtaccgctgcgctgatcgacagcgaatcgacgtt<br/>ctgcctcggcaggctgcacagcgttccggtggcaacgaaaaacaagcttgg<br/>aactgccgcgcaactgttcgaagaacaggctaaacgcccgtatgtgttgg<br/>cctgctgctggcggaagttatccgcaccaacgagctgaaagctgacgaagag<br/>cgcgtgaaagcctgatcgaagagatggcttctgctacgaagatccgaaag<br/>aagttatcagattctacagcaaaaaacaagaactgatggacaacatgcccga<br/>tgttgctctggaagaacaggctgttgaagctgactggcgaaagcgaaggtg<br/>actgaaaaagaaaccacttcaacgagctgatgaaccagcaggcg</p>                                                                                                                                                                                    |
| <i>lacI<sub>W220F</sub></i> | gene | (5)     | <p>atgaaaccagtaacgttatacgatgtcgcagagatgcccgtgtctcttatac<br/>agaccgttcccgctgggtgaaccaggccagccacgttctcgcgaaaccg<br/>ggaaaaagtgaagcggcgatggcggagctgaattacattccaaccgcgtg<br/>gcacaacaactggcgggcaaacagctgctgctgattggcgttggccacctcca<br/>gcttgccctgcacgcgctgcaaaatgtcgcggcgataaatctcgcgc<br/>cgatcaactgggtgccagcgtgggtgtcgatggtagaacgaagcggcgtc<br/>gaaagcctgtaaaagcggctgcacaatctctcgcgcaacgcgctcagtggg<br/>tgatcattaactatccgctggatgaccaggatgccattgctgtggaagctgc<br/>ctgcactaatgttccggcgttatctctgtatgtctctgaccagacaccaatc<br/>aacagtatattttctcccatgaggacggtagcgcactggcgctggagcatc<br/>tgctgcattgggtcaccagcaaatcgcgctgttagcgggcccattaaagttc<br/>tgtctcggcgcgtctcgtctggctggctggcataaatactcactcgcgaat<br/>caaatcagccgatagcggaaacgggaagggcactttagtgccatgtccggtt<br/>ttcaacaaccatgcaaatgctgaatgagggcatcgttccactgcgatgct<br/>ggttgccaacgatcagatggcgtggcgcaatgcccgcattaccgagctcc<br/>ggctgcccgttggcggatctcggtagtgggatacagacgataccgaaag<br/>atagctcatgttatatcccgcgttaaccaccaacaacaggattttcgcct<br/>gctggggcaaacagcgtggaccgcttgcgtgcaactctctcagggcccaggcg<br/>gtgaaggcaatcagctgttgcagctcactgggtgaaaagaaaaaccacc<br/>tgccgccaatacgaaccgcctctcccgcgcttggccgattcattaat<br/>gcagctggcagcagaggttcccgactggaagcgggcagtgataa</p>                                                                                                                                                                                                                                                                                                                                                                                                                         |
| <i>araC</i>                 | gene |         | <p>atggctgaagcgcgcaaaatgatcccctgctgcccgggatactcgtttaatgcc<br/>atctggctggcgggttaacgccgatgaggccaacggttatctcgatTTTTT<br/>TTCAGCCAGCCTGGGAATGAAAGGTTATATCTCAATCTCAACCTTCG<br/>gttcaggggggtgtgaaaaatcagggacgagaattgttggcgcagccgggtg<br/>atattttgctgttcccgcagagagattcatcactacggtcgtcatccgga<br/>ggctcggaaatggtatcaccagtggtttacttctcgcgcgctcactgg<br/>catgaaatggcttaactggcgcgcaaatattggcaaatacgggttctttcc<br/>cggatgaagcgcaccagccgatttcagcgacctgttgggcaaatcattaa</p>                                                                                                                                                                                                                                                                                                                                                                                                                                                                                                                                                                                                                                                                                                                                                                                                                                                                                                                                                                                                                                                                                                                                                                     |

|                  |      |                                                                                                                                                                                                                                                                                                                                                                                                                                                                                                                                                                                                                                                                                                                                                                                                                                                                                                                                                                                                                                                                                                                                                                                                                                                                                                                                                                                                                                                                                                                                                                                                                                                                                                                                                                                                                                                                                                                                                                                                                                                                                                                                                                                                                                  |
|------------------|------|----------------------------------------------------------------------------------------------------------------------------------------------------------------------------------------------------------------------------------------------------------------------------------------------------------------------------------------------------------------------------------------------------------------------------------------------------------------------------------------------------------------------------------------------------------------------------------------------------------------------------------------------------------------------------------------------------------------------------------------------------------------------------------------------------------------------------------------------------------------------------------------------------------------------------------------------------------------------------------------------------------------------------------------------------------------------------------------------------------------------------------------------------------------------------------------------------------------------------------------------------------------------------------------------------------------------------------------------------------------------------------------------------------------------------------------------------------------------------------------------------------------------------------------------------------------------------------------------------------------------------------------------------------------------------------------------------------------------------------------------------------------------------------------------------------------------------------------------------------------------------------------------------------------------------------------------------------------------------------------------------------------------------------------------------------------------------------------------------------------------------------------------------------------------------------------------------------------------------------|
|                  |      | <p>cgccgggcaaggggaagggcgctattcggagctgctggcgataaatctgctt (21)<br/> gagcaattgttactgcgggcgaatggaagcgattaacgagtcgctccatccac<br/> cgatggataatcgggtacgcgaggttgcagttacatcagcgatcactggc<br/> agacagcaattttgatcagccagcgtcgacagcagcttggctgtcgccg<br/> tcgctgtgtcacatctttccgccagcagttagggattagcgtcttaagct<br/> ggcgcgaggaccacgtatcagccagcgaaagctgcttttgagccaccgc<br/> gatgcctatcgccaccgctggctcgcaatgttggttttgacgatcaactctat<br/> ttctcggggtatttaaaaaatgcacggggccagcccagcgagttccgtg<br/> ccggttgtgaagaaaaagtgaatgatgtagccgtcaagttgtcataa</p>                                                                                                                                                                                                                                                                                                                                                                                                                                                                                                                                                                                                                                                                                                                                                                                                                                                                                                                                                                                                                                                                                                                                                                                                                                                                                                                                                                                                                                                                                                                                                                                                                                                                                                 |
| <i>core-sz17</i> | gene | <p>atgaacacgattaacatcgctaagaacgacttctctgacatcgaactggctg<br/> ctatcccgttcaacactctggctgaccattacgggtgagcgttttagctcgga<br/> acagttggcccttgagcatgagctcttacgagatgggtgaagcagcgttccgc<br/> aagatgtttgagcgtcaacttaagctggtagggttgcggataaacgctgcc<br/> ccaagcctctcatcactaccctactccctaagatgattgcacgcatacagca<br/> ctggtttgaggaagtgaagctaaagcggcgaagcggccgacagccttccag<br/> ttcctgcaagaaatcaagccggaagcgtgagctacatcaccattaaagcca<br/> ctctggcttgccctaacagctgctgacaatacaaccgttcaggctgtagaag<br/> cgcaatcggtcgggccattgagcagcagcgtcgtctcggtcgtatccgtgac<br/> cttgaagctaagcacttcaagaaaaacgttgaggaacaactcaacaagcgg<br/> tagggcacgtctacaagaagcatttatgcaagttgtcgagcgtgacatgct<br/> ctctaagggtctactcgggtggcagcgtggctctcgtggcgaatgaagagac<br/> tctatcattgtaggtagcgtgcatogagatgctcattgagcaaccggaa<br/> tggttgacttacaccgcaaaatgctggcgtagtaggtcaagactctgagac<br/> tatcgaactcgcacctgaatacgtgagcgtatcgcaaccctgaggtggc<br/> ctggtggcatctcctcgatgttccaaccttgcgtagttcctcctaagcgt<br/> ggactggcattactggtggtggctattgggctaaccgctcgtcctcctggc<br/> gctggtgctactcacaagtaagaagcactgatgctcagcaagacgctttac<br/> atgctgaggtgtacaagcgtataacattgcgcaaaacaccgcatggaaaa<br/> tcaacaagaagctcctagcgtcgccacgtaatacacaagtggaagcattg (7)<br/> tccggtcagggacatccctgcatgagcgtgaagaactcccgatgaaacc<br/> gaagacatcgacatgaatcctgagcgtctcaccgctggaaacgctgcgc<br/> ctgctgtgtaccgcaagcaaggtcgcgaagtctcggcgtatcagccttga<br/> gttcatgcttgagcaagcaataagtttgcataaccataaggccatctggttc<br/> ccttacaacatggactggcggcgtcgtgttacgctgtgcaatgttcaacc<br/> cgcaaggtaacgatatgaccaaaggactgcttacgctggcgaaggtaaacc<br/> aatcggtaaaggaaggttactactggctgaaaatccaaggtgcaactgtg<br/> agtgctgcaaggttcogttccctgagcgcatacaagttcattgaggaaac<br/> acgaaacatcatggcttgcgctaaagctcaccctggagaacacttgggggg<br/> tgagcaagatctccgttctgcttccctgogtctctgotttgagtagcgtgg<br/> gtacagcaccacggcctgagctataactgctccctcogctggcgtttgacg<br/> ggtctgtgcttggcctcagcacttctccgcatgctccgagatgaggttag<br/> tgctcggcgggttaacttgcttccctagtgaaaccgttcaggacatctacgg<br/> attgttgctaagaagtaacgagattctacaagcagacgcaatcaatggga<br/> ccgataaacgaagtagttaccgtgaccgatgagaacggaggttcaggtggtg<br/> atccaacgaaaaagaagaactgaaatccaaaaagcggaaactgcgaaccgt<br/> atcgaacagctgaaacagaacgtgaacaactgaagcagaaaaatcggcaacc<br/> tcggtaaagaaatcgaagcttacaataa</p> |
| <i>sz18-σ-73</i> | gene | <p>atgagcatcgcggcaccctggagaacgatctggcgcgtctggaaaaacgaaa<br/> acgctcgtctcgaaaaagacatcgcgaacctggaacgtgacctggcgaact<br/> ggagcgtgaagaagcgtacttcggaggttcaggtggtgaagaacactgggtaa<br/> atctctgagaaaagtaagctgggcaactaaggcactggctggtaaatggctgg<br/> cttacggtgttactcgcagtgtaagcgttcagtcacgctggctta<br/> cgggtccaagagttcggctccgtcaacaagtgctggaagataccattcag<br/> ccagctattgatccggcaaggtctgatgtcactcagccgaatcaggtg<br/> ctggatcacatggctaagctgatttgggaatctgtgagcgtgacggtggtagc<br/> tgcggttgaagcaatgaactggcttaagctcgtgcttaagctcgtggctgct<br/> gaggtcaaaagataagaagactggagagattctcgaagcgttgccgtgtgc (7)<br/> attgggtaactcctgatggtttccctggtggcaggaatacaagaagcctat<br/> tcagaagcgcctggacatgatttcttgggtcaatttcgcttgcaacctacc<br/> ataacaccaacaagatagcagattgatgcacacaaacaggagctcggta<br/> tcgctcctaactttgtacacagccaagcggtagccaccttcgtaagactgt<br/> agtgtggcacacgagaagtaacggaatcgaatctttgactgattcaagc<br/> tccttcggtacgatccggctgacgctgcgaacctgttcaagcagtgccg<br/> aaactatggttgacacatagctctgtgatgtactggctgatttctacga<br/> ccagttcgtgaccagttgcacgagtcctcaattggcaaaaatgccagcactt<br/> ccggctaaaggttaacttgaacctccgtgacatcttagagtcggactcgcgt<br/> tcgctgtaa</p>                                                                                                                                                                                                                                                                                                                                                                                                                                                                                                                                                                                                                                                                                                                                                                                                                                                                                                                                                                                                                                                                                          |

**Table S2.** Accession number for plasmids used in this study

| Plasmid name | GenBank accession number |
|--------------|--------------------------|
| ptevF-TetR   | KX353594                 |
| ptevF-PhIF   | KX353595                 |
| pNus-TetR    | KX353596                 |
| pTig-PhIF    | KX353597                 |
| pTac-TEV     | KX353598                 |
| pTac-Su      | KX353599                 |
| pTEV         | KX353600                 |
| pTVMV        | KX353601                 |
| pSuMMV       | KX353602                 |
| ptevY-GFP    | KX353603                 |
| ptvmvY-GFP   | KX353604                 |
| psummvY-GFP  | KX353605                 |
| pPoly-Deg    | KX353606                 |
| pPoly-Rel    | KX353607                 |
| pPoly-Switch | KX353608                 |
| pTac-TEV-Su  | KX353609                 |
| pCore        | KX353610                 |
| pTac-T3      | KX353611                 |
| pTac-T3-Su   | KX353612                 |
| pT3-GFP-LVA  | KX353613                 |
| pBAD-Su      | KX353614                 |

## Supplementary References

1. **Stanton BC, Nielsen AAK, Tamsir A, Clancy K, Peterson T, Voigt CA.** 2014. Genomic mining of prokaryotic repressors for orthogonal logic gates. *Nat Chem Biol* **10**:99–105.
2. **Lou C, Stanton B, Chen Y-J, Munsy B, Voigt CA.** 2012. Ribozyme-based insulator parts buffer synthetic circuits from genetic context. *Nat Biotechnol* **30**:1137–1142.
3. **Nielsen AAK, Der BS, Shin J, Vaidyanathan P, Paralanov V, Strychalski EA, Ross D, Densmore D, Voigt CA.** 2016. Genetic circuit design automation. *Science* **352**:aac7341.
4. **Durfee T, Nelson R, Baldwin S, Plunkett G, Burland V, Mau B, Petrosino JF, Qin X, Muzny DM, Ayele M, Gibbs RA, Csörgo B, Pósfai G, Weinstock GM, Blattner FR.** 2008. The complete genome sequence of *Escherichia coli* DH10B: insights into the biology of a laboratory workhorse. *J Bacteriol* **190**:2597–2606.
5. **Gatti-Lafranconi P, Dijkman WP, Devenish SRA, Hollfelder F.** 2013. A single mutation in the core domain of the lac repressor reduces leakiness. *Microb Cell Factories* **12**:67.
6. **Wang KH, Oakes ESC, Sauer RT, Baker TA.** 2008. Tuning the strength of a bacterial N-end rule degradation signal. *J Biol Chem* **283**:24600–24607.
7. **Segall-Shapiro TH, Meyer AJ, Ellington AD, Sontag ED, Voigt CA.** 2014. A “resource allocator” for transcription based on a highly fragmented T7 RNA polymerase. *Mol Syst Biol* **10**:742.
8. **Andersen JB, Sternberg C, Poulsen LK, Bjørn SP, Givskov M, Molin S.** 1998. New Unstable Variants of Green Fluorescent Protein for Studies of Transient Gene Expression in Bacteria. *Appl Environ Microbiol* **64**:2240–2246.



9. **Quinn JY, Cox RS, Adler A, Beal J, Bhatia S, Cai Y, Chen J, Clancy K, Galdzicki M, Hillson NJ, Le Novère N, Maheshwari AJ, McLaughlin JA, Myers CJ, P U, Pocock M, Rodriguez C, Soldatova L, Stan G-BV, Swainston N, Wipat A, Sauro HM.** 2015. SBOL Visual: A Graphical Language for Genetic Designs. *PLoS Biol* **13**:e1002310.
10. **Anderson JC.** 2009. Registry of Standard Biological Parts [[www.partsregistry.org](http://www.partsregistry.org)].
11. **Yang L, Nielsen AAK, Fernandez-Rodriguez J, McClune CJ, Laub MT, Lu TK, Voigt CA.** 2014. Permanent genetic memory with >1-byte capacity. *Nat Methods* **11**:1261–1266.
12. Registry of Standard Biological Parts. [[www.partsregistry.org](http://www.partsregistry.org)].
13. **Chen Y-J, Liu P, Nielsen AAK, Brophy JAN, Clancy K, Peterson T, Voigt CA.** 2013. Characterization of 582 natural and synthetic terminators and quantification of their design constraints. *Nat Methods* **10**:659–664.
14. **Kapust RB, Tözsér J, Copeland TD, Waugh DS.** 2002. The P1' specificity of tobacco etch virus protease. *Biochem Biophys Res Commun* **294**:949–955.
15. **Sun P, Austin BP, Tözsér J, Waugh DS.** 2010. Structural determinants of tobacco vein mottling virus protease substrate specificity. *Protein Sci Publ Protein Soc* **19**:2240–2251.
16. **Adams MJ, Antoniw JF, Beaudoin F.** 2005. Overview and analysis of the polyprotein cleavage sites in the family Potyviridae. *Mol Plant Pathol* **6**:471–487.
17. **Taxis C, Stier G, Spadaccini R, Knop M.** 2009. Efficient protein depletion by genetically controlled deprotection of a dormant N-degron. *Mol Syst Biol* **5**:267.
18. **Pédelacq J-D, Cabantous S, Tran T, Terwilliger TC, Waldo GS.** 2006. Engineering and characterization of a superfolder green fluorescent protein. *Nat Biotechnol* **24**:79–88.

19. **Campbell RE, Tour O, Palmer AE, Steinbach PA, Baird GS, Zacharias DA, Tsien RY.** 2002. A monomeric red fluorescent protein. *Proc Natl Acad Sci* **99**:7877–7882.
20. **Stoller G, Rücknagel KP, Nierhaus KH, Schmid FX, Fischer G, Rahfeld JU.** 1995. A ribosome-associated peptidyl-prolyl cis/trans isomerase identified as the trigger factor. *EMBO J* **14**:4939–4948.
21. **Moon TS, Clarke EJ, Groban ES, Tamsir A, Clark RM, Eames M, Kortemme T, Voigt CA.** 2011. Construction of a genetic multiplexer to toggle between chemosensory pathways in *Escherichia coli*. *J Mol Biol* **406**:215–227.
